# Supplementary material for: Downregulation of ciRNA‐ Kat6b in dorsal spinal horn is required for neuropathic pain by regulating Kcnk1 in miRNA‐26a‐dependent manner
Source: PubMed Central journal article supplement (PMC10493661; doi:10.1111/cns.14235), 2023-05-05

Note: The gel image in the square was used in Figures in this study.

Figure 1B

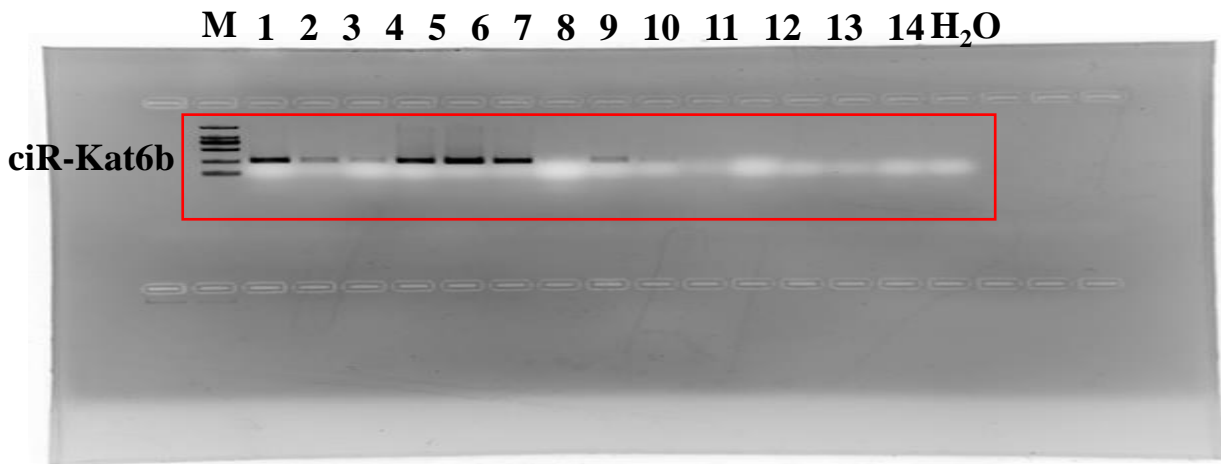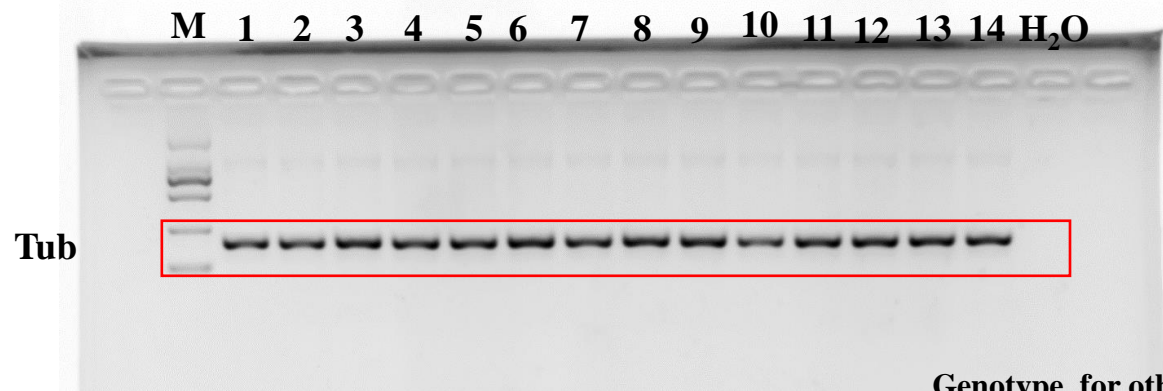

Genotype for other study

Figure 1D

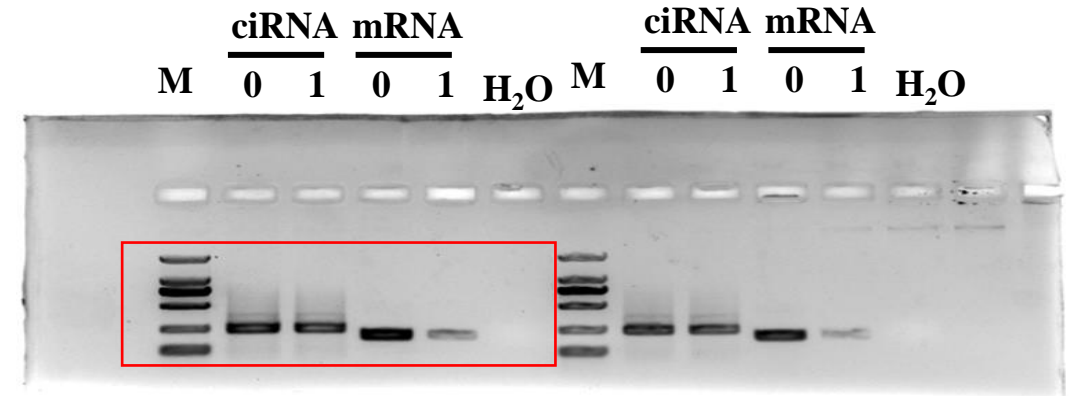

Figure 1F

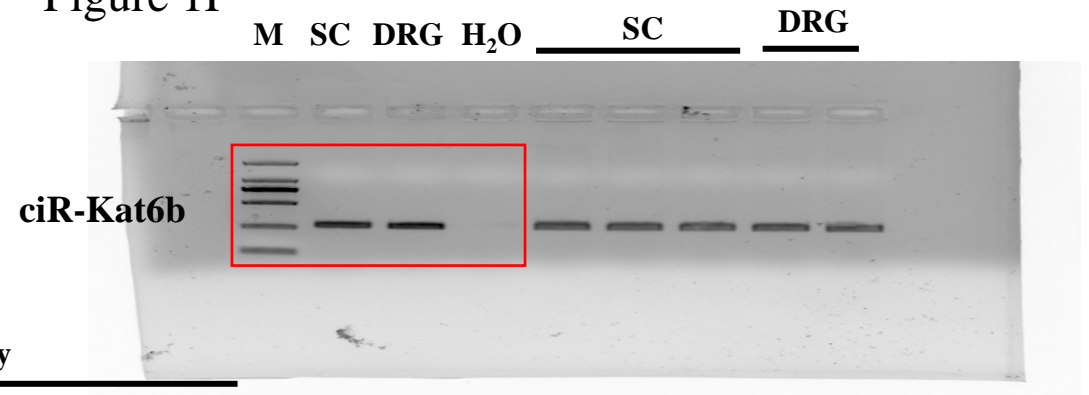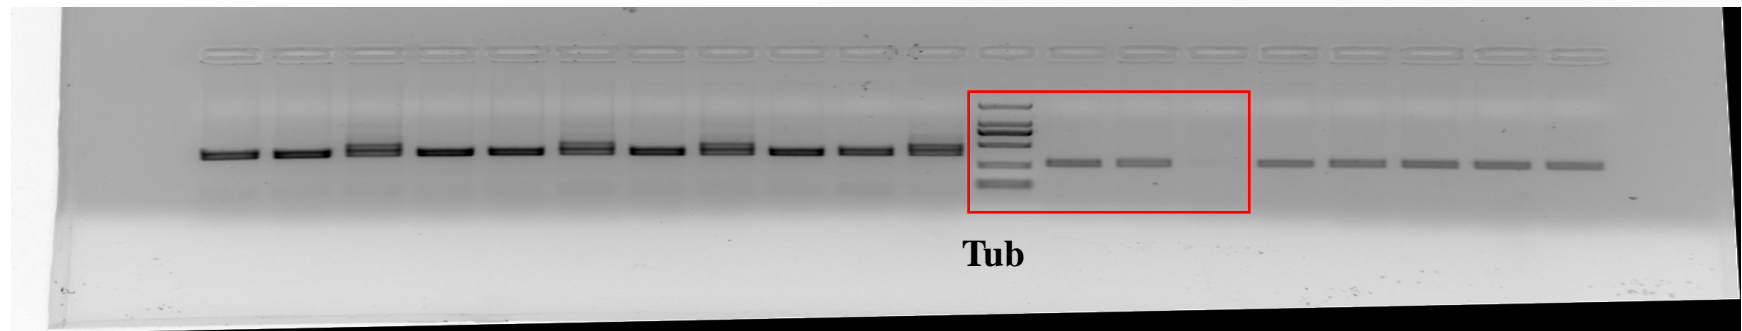

Figure 4B

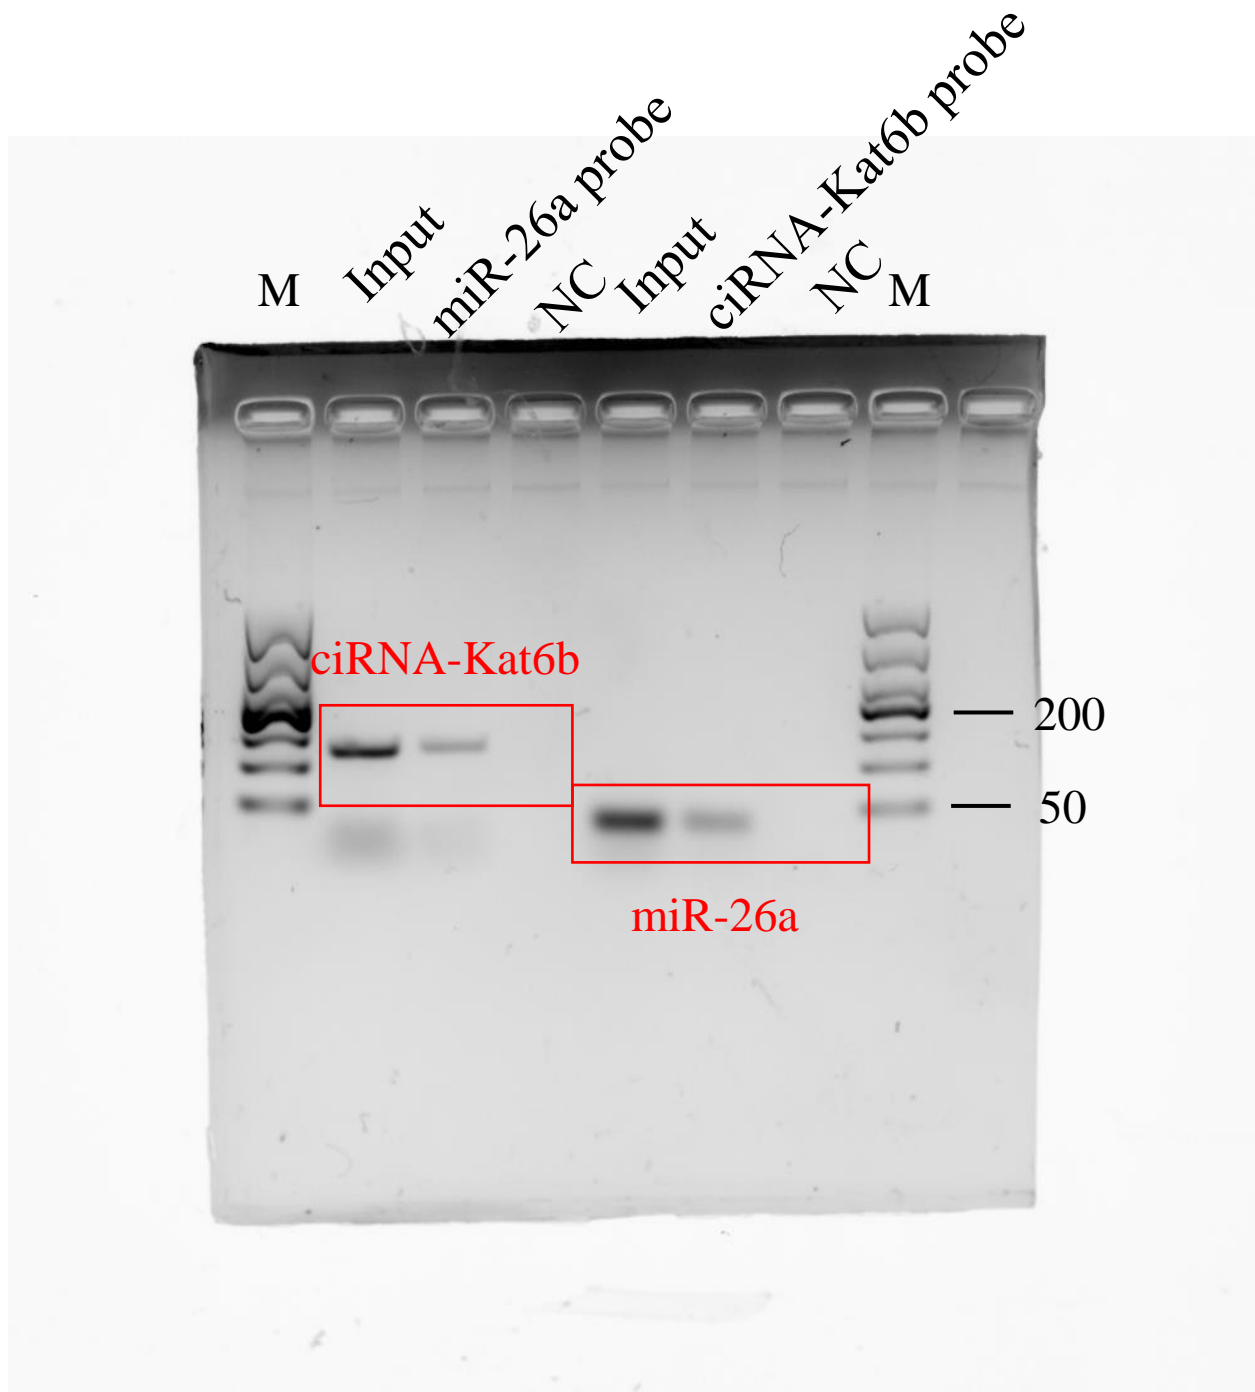



Figure 6E

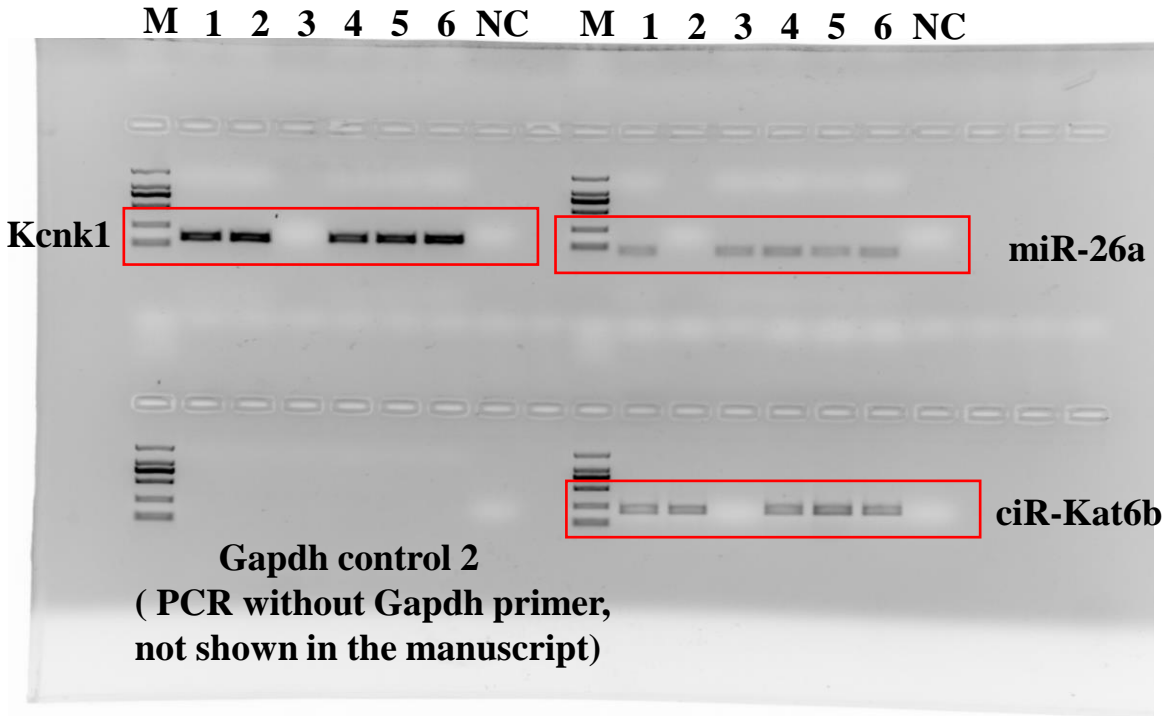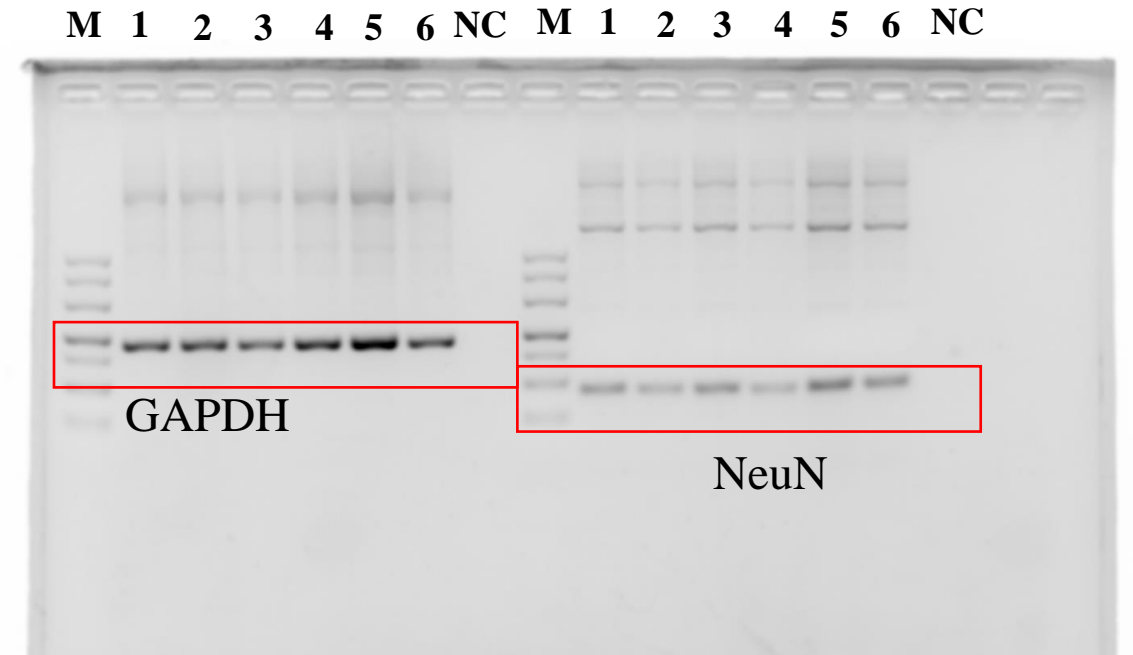

Figure 6H

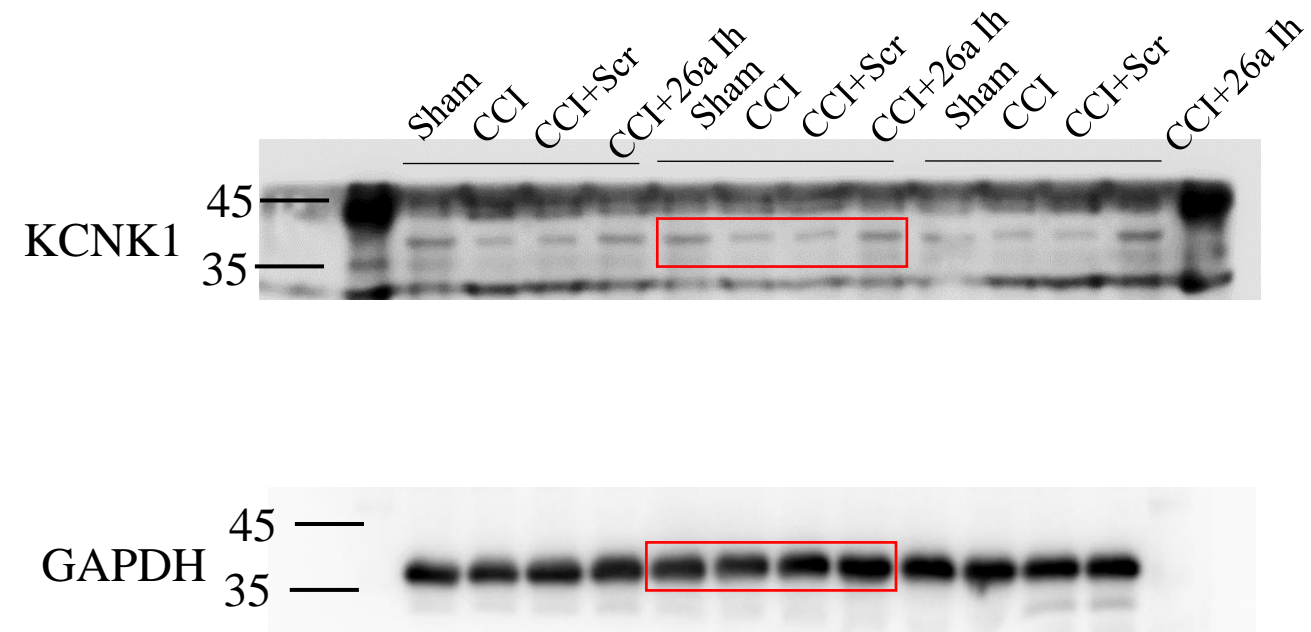



Figure 7A

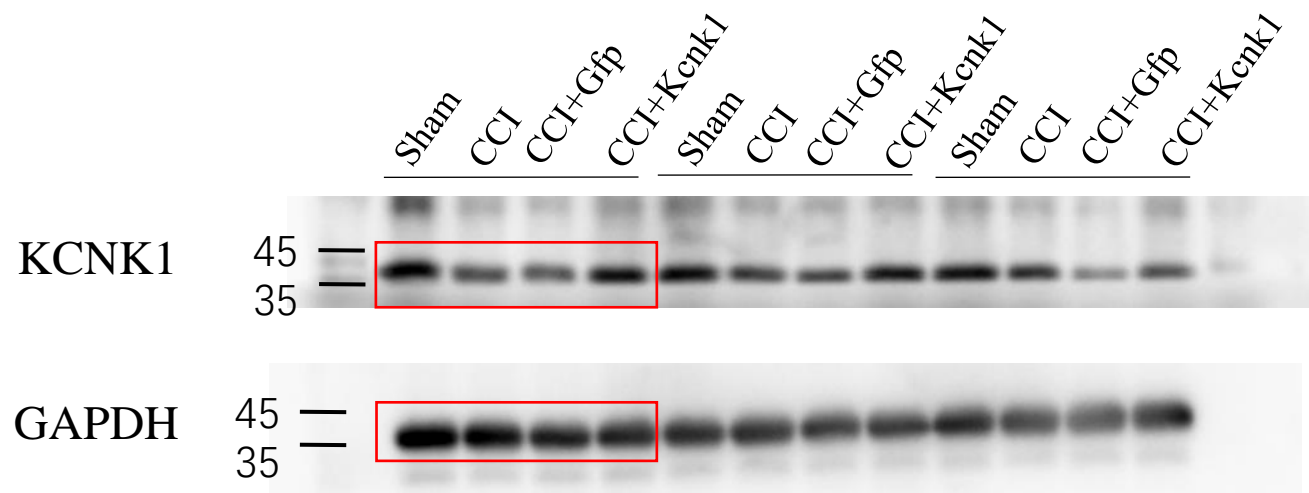

Figure 7D

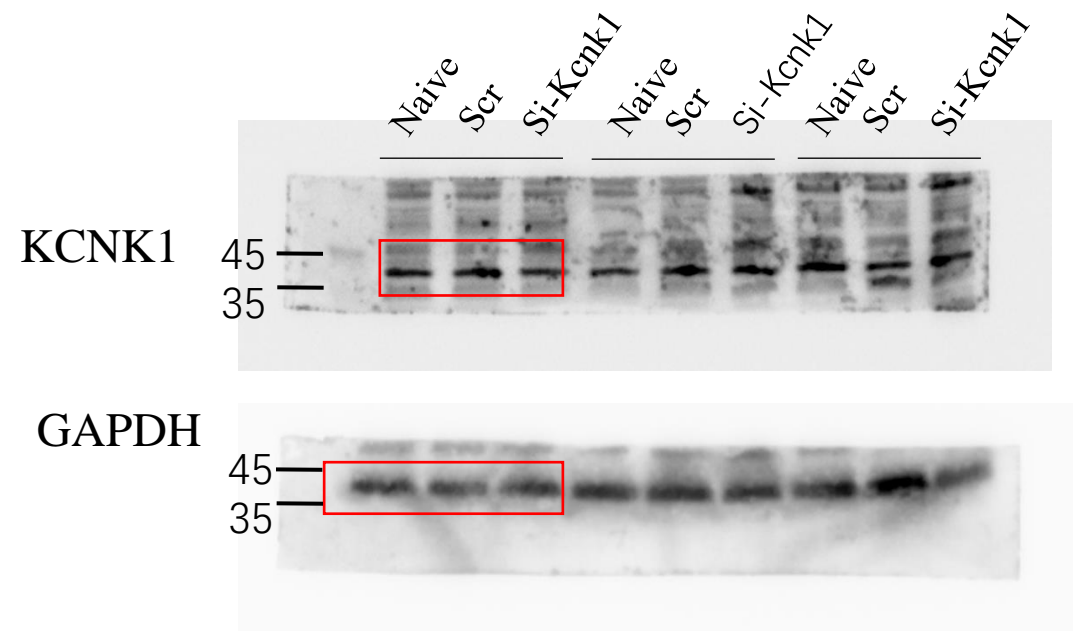

Supplement: CNS-29-2955-s004.pdf [file CNS-29-2955-s004.pdf]
